# Supplementary material for: Association of Antihypertensive Effects of Esaxerenone with the Internal Sodium Balance in Dahl Salt-Sensitive Hypertensive Rats
Source: MDPI journal article supplement (doi:10.3390/ijms23168915), 2022-08-10
Supplement: s1 [file s1]

**A**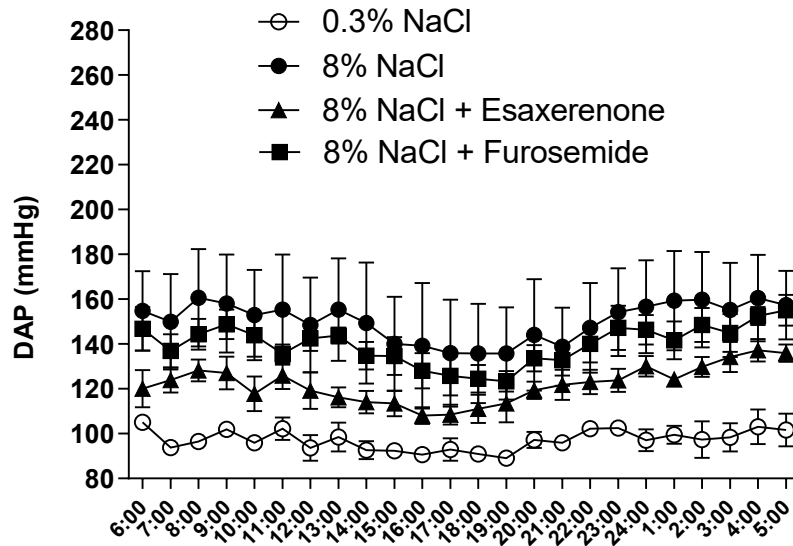**B**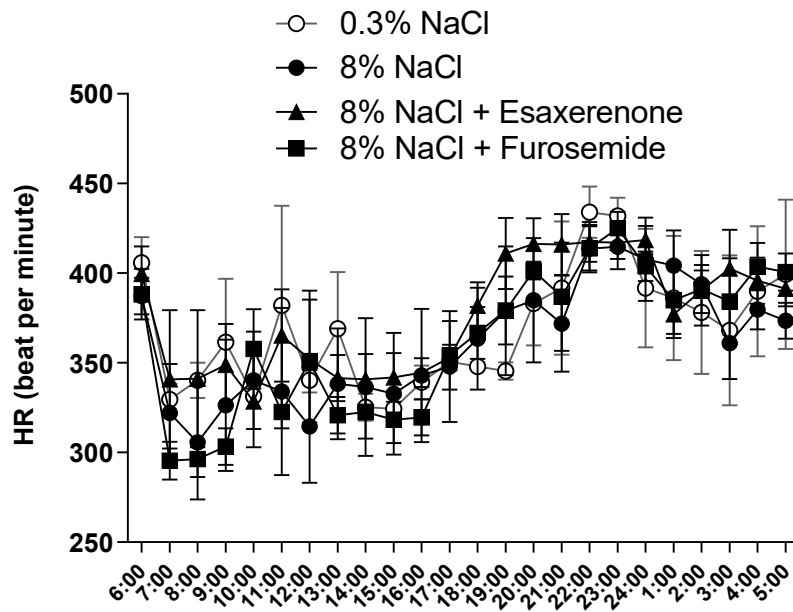

# Figure S2

**A**

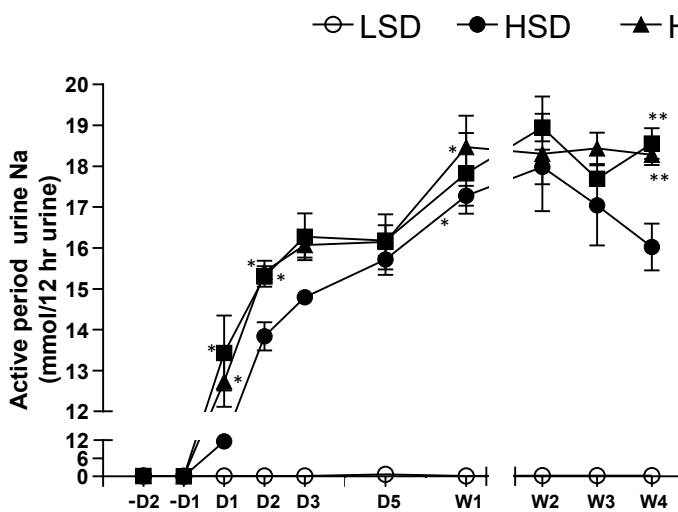

**B**

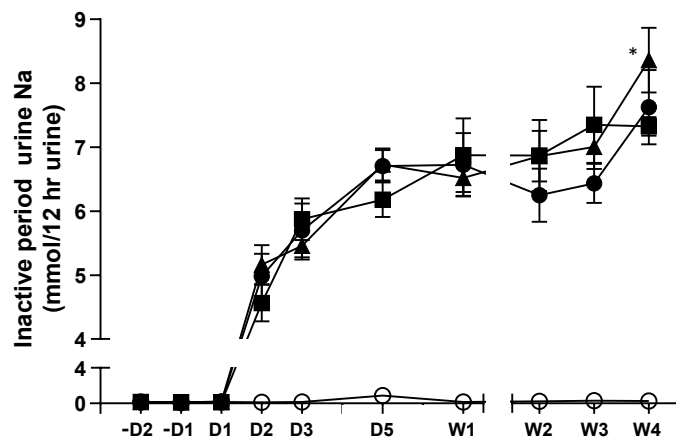

**C**

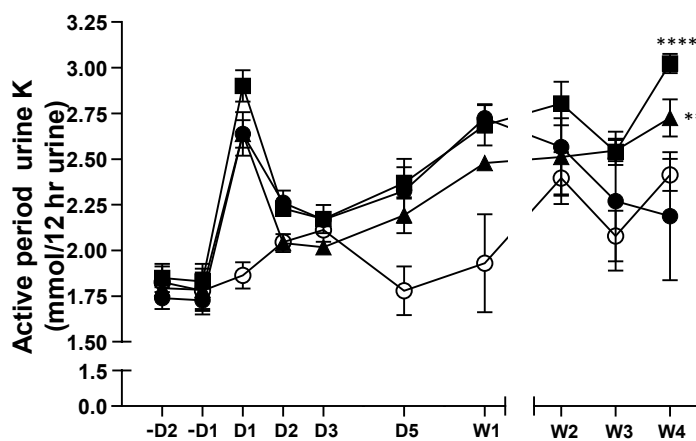

**D**

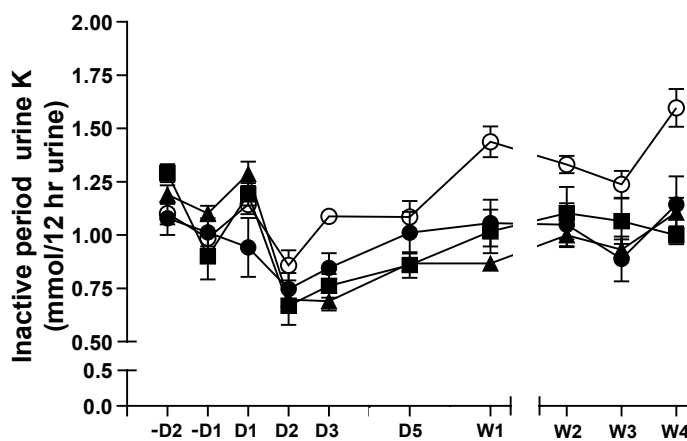

# Figure S3

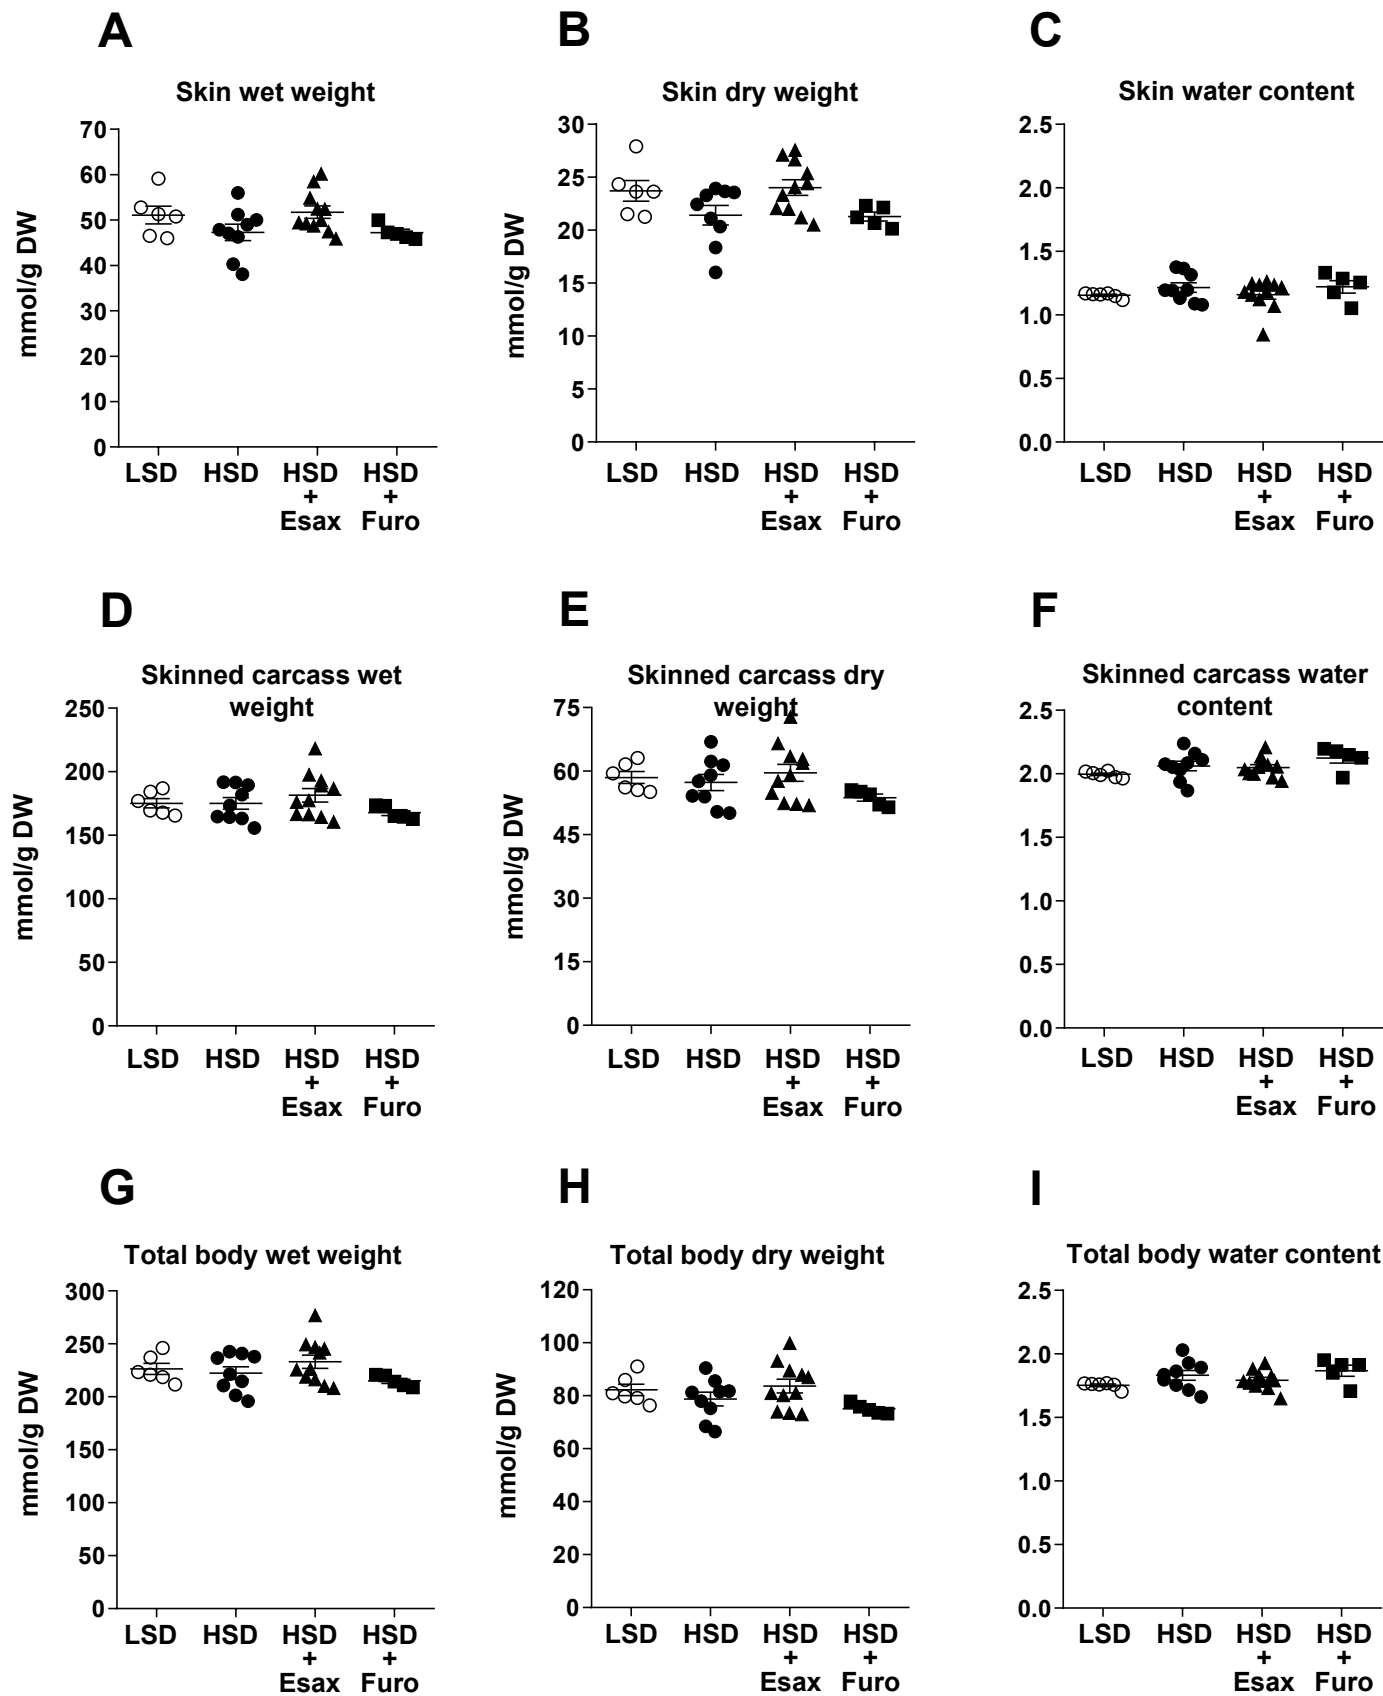

## Supplementary figure legends

**Figure S1.** Changes in DAP and heart rate in HS-loaded DSS rats. Twenty-four-hour (A) DAP and (B) heart rate as measured by a radiotelemetry system in conscious rats after 4 weeks of treatment.

**Figure S2.** Urinary excretion of Na, and K. Urinary excretion of Na in the (A) active and (B) inactive periods. Urinary excretion of K in the (C) active and (D) inactive periods. \* $p < 0.05$ , \*\* $p < 0.01$ , \*\*\*\* $p < 0.0001$  vs an HSD.

**Figure S3.** Wet weight, dry weight and water content. Skin (A) wet weight, (B) dry weight, and (C) water content in the different intervention groups. Skinned carcass (D) wet weight, (E) dry weight, and (F) water content in the different intervention groups. Total body (G) wet weight, (H) dry weight, and (I) water content in the different intervention groups.
